# Supplementary material
Source: publisher site journal article supplement (https://www.dovepress.com/article/351840)
Supplement: Supplementary file 1 [file get_supplementary_file.php]

**Supplementary Online Content**

**Nocturnal oxygen desaturation index correlates with respiratory depression in post-surgical patients receiving opioids – A post-hoc analysis from the PRediction of Opioid-induced respiratory Depression In patients monitored by capnoGraphY (PRODIGY) study**

**Supplementary Table 1** Multivariable regression model of risk of at least 2 nocturnal occurrences of ODI4% and its association with respiratory depression

**Supplementary Table 2** Multivariable regression model of risk of at least 5 occurrences of ODI4% per hour and its association with respiratory depression

**Supplementary Table 3** Multivariable model of risk of at least 10 occurrences of ODI4% per hour and its association with respiratory depression

**Supplementary Table 4** Multivariable model of risk of at least 15 occurrences of ODI4% per hour and its association with respiratory depression

**Supplementary Table 1** Multivariable regression model of risk of at least 2 nocturnal occurrences of ODI4% and its association with respiratory depression

| **Parameter** | **Estimate** | **Standard Error** | **Odds Ratio** | **95% Wald CI** | | **p-value** |
| --- | --- | --- | --- | --- | --- | --- |
| **Lower CI** | **Upper CI** |
| Length of monitoring (valid data) | 0.16 | 0.07 | 1.03 | 1.03 | 1.34 | 0.0137 |
| Geography (Asia vs United States) | 0.83 | 0.19 | 1.57 | 1.57 | 3.32 | <0.0001 |
| Geography (Europe vs United States) | 0.45 | 0.21 | 1.04 | 1.04 | 2.35 | 0.0332 |
| Opioid Naive | 0.47 | 0.18 | 1.11 | 1.11 | 2.31 | 0.0118 |
| Age (≥60 to <70 vs <60) | 0.85 | 0.16 | 1.70 | 1.70 | 3.19 | <0.0001 |
| Age (≥70 to <80 vs <60) | 1.30 | 0.20 | 2.48 | 2.48 | 5.42 | <0.0001 |
| Age (≥80 vs <60) | 1.82 | 0.43 | 2.66 | 2.66 | 14.36 | <0.0001 |
| Male Sex | 0.70 | 0.14 | 1.53 | 1.53 | 2.66 | <0.0001 |
| Sleep Disordered Breathing | 0.45 | 0.22 | 1.02 | 1.02 | 2.41 | 0.0414 |
| Chronic Heart Failure | 0.88 | 0.44 | 1.02 | 1.02 | 5.70 | 0.0444 |
| ODI 4% (≥0.34 vs <0.34) episodes/hra | 0.84 | 0.16 | 1.68 | 1.68 | 3.19 | <0.0001 |
|  | | | | | | |
| **Hosmer-Lemeshow p-value** | 0.89 | | | | | |
| **AUC (95% Wald CI)** | 0.73 (0.70-0.76) | | | | | |

**Notes**: aStatistically optimal cutoff for correlating to RD episodes, determined using the receiver operating characteristic curve.

**Abbreviations**: CI, confidence interval; AUC, area under the curve; ODI, oxygen desaturation index.

**Supplementary Table 2** Multivariable regression model of risk of at least 5 occurrences of ODI 4% per hour and its association with respiratory depression

| **Parameter** | **Estimate** | **Standard Error** | **Odds Ratio** | **95% Wald CI** | | **p-value** |
| --- | --- | --- | --- | --- | --- | --- |
| **Lower CI** | **Upper CI** |
| Length of monitoring (valid data) | 0.20 | 0.07 | 1.22 | 1.07 | 1.39 | 0.0028 |
| Geography (Asia vs United States) | 0.62 | 0.18 | 1.85 | 1.31 | 2.62 | 0.0005 |
| Geography (Europe vs United States) | 0.21 | 0.20 | 1.23 | 0.84 | 1.81 | 0.29 |
| Opioid Naive | 0.44 | 0.19 | 1.55 | 1.08 | 2.25 | 0.0191 |
| Age (≥60 to <70 vs <60) | 0.82 | 0.16 | 2.26 | 1.66 | 3.09 | <0.0001 |
| Age (≥70 to <80 vs <60) | 1.32 | 0.20 | 3.74 | 2.53 | 5.53 | <0.0001 |
| Age (≥80 vs <60) | 1.83 | 0.43 | 6.26 | 2.72 | 14.42 | <0.0001 |
| Male Sex | 0.72 | 0.14 | 2.05 | 1.56 | 2.69 | <0.0001 |
| Sleep Disordered Breathing | 0.47 | 0.22 | 1.60 | 1.03 | 2.47 | 0.0349 |
| Chronic Heart Failure | 0.73 | 0.44 | 2.08 | 0.88 | 5.00 | 0.10 |
| ODI 4% (≥5 vs <5) episodes/hr | 0.95 | 0.21 | 2.59 | 1.72 | 3.89 | <0.0001 |
|  | | | | | | |
| **Hosmer-Lemeshow p-value** | 0.30 | | | | | |
| **AUC (95% Wald CI)** | 0.73 (0.69-0.76) | | | | | |

**Abbreviations**: CI, confidence interval; AUC, area under the curve; ODI, oxygen desaturation index.

**Supplementary Table 3** Multivariable model of risk of at least 10 occurrences of ODI 4% per hour and its association with respiratory depression

| **Parameter** | **Estimate** | **Standard Error** | **Odds Ratio** | **95% Wald CI** | | **p-value** |
| --- | --- | --- | --- | --- | --- | --- |
| **Lower CI** | **Upper CI** |
| Length of monitoring (valid data) | 0.21 | 0.07 | 1.23 | 1.08 | 1.40 | 0.0017 |
| Geography (Asia vs United States) | 0.54 | 0.17 | 1.72 | 1.22 | 2.42 | 0.0019 |
| Geography (Europe vs United States) | 0.13 | 0.19 | 1.14 | 0.78 | 1.66 | 0.51 |
| Opioid Naive | 0.37 | 0.19 | 1.44 | 1.00 | 2.08 | 0.0492 |
| Age (≥60 to <70 vs <60) | 0.80 | 0.16 | 2.24 | 1.64 | 3.05 | <0.0001 |
| Age (≥70 to <80 vs <60) | 1.34 | 0.20 | 3.83 | 2.59 | 5.64 | <0.0001 |
| Age (≥80 vs <60) | 1.81 | 0.42 | 6.10 | 2.68 | 13.93 | <0.0001 |
| Male Sex | 0.73 | 0.14 | 2.08 | 1.58 | 2.73 | <0.0001 |
| Sleep Disordered Breathing | 0.43 | 0.22 | 1.53 | 1.00 | 2.37 | 0.0526 |
| Chronic Heart Failure | 0.67 | 0.44 | 1.20 | 0.82 | 4.67 | 0.13 |
| ODI 4% (≥10 vs <10) episodes/hr | 1.22 | 0.32 | 3.39 | 1.80 | 6.39 | 0.0002 |
|  | | | | | | |
| **Hosmer-Lemeshow p-value** | 0.65 | | | | | |
| **AUC (95% Wald CI)** | 0.72 (0.69-0.76) | | | | | |

**Abbreviations**: CI, confidence interval; AUC, area under the curve; ODI, oxygen desaturation index.

**Supplementary Table 4** Multivariable model of risk of at least 15 occurrences of ODI 4% per hour and its association with respiratory depression

| **Parameter** | **Estimate** | **Standard Error** | **Odds Ratio** | **95% Wald CI** | | **p-value** |
| --- | --- | --- | --- | --- | --- | --- |
| **Lower CI** | **Upper CI** |
| Length of monitoring (valid data) | 0.21 | 0.07 | 1.23 | 1.08 | 1.40 | 0.0018 |
| Geography (Asia vs United States) | 0.51 | 0.17 | 1.66 | 1.18 | 2.33 | 0.0036 |
| Geography (Europe vs United States) | 0.10 | 0.19 | 1.11 | 0.76 | 1.62 | 0.59 |
| Opioid Naive | 0.35 | 0.185 | 1.42 | 1.00 | 2.04 | 0.0580 |
| Age (≥60 to <70 vs <60) | 0.84 | 0.158 | 2.31 | 1.69 | 3.15 | <0.0001 |
| Age (≥70 to <80 vs <60) | 1.35 | 0.20 | 3.84 | 2.61 | 5.67 | <0.0001 |
| Age (≥80 vs <60) | 1.85 | 0.42 | 6.39 | 2.80 | 14.56 | <0.0001 |
| Male Sex | 0.75 | 0.14 | 2.10 | 1.59 | 2.75 | <0.0001 |
| Sleep Disordered Breathing | 0.43 | 0.22 | 1.53 | 1.00 | 2.36 | 0.0535 |
| Chronic Heart Failure | 0.60 | 0.44 | 1.82 | 0.76 | 4.36 | 0.18 |
| ODI 4% (≥15 vs <15) episodes/hr | 1.55 | 0.45 | 4.7 | 1.93 | 11.47 | 0.0006 |
|  | | | | | | |
| **Hosmer-Lemeshow p-value** | 0.71 | | | | | |
| **AUC (95% Wald CI)** | 0.72 (0.69-0.75) | | | | | |

**Abbreviations**: CI, confidence interval; AUC, area under the curve; ODI, oxygen desaturation index.
